# Supplementary material
Source: publisher figshare collection journal article supplement (https://brill.figshare.com/ndownloader/files/26563796)
Supplement: Supplementary file 1 [file 26563796]

## **Identification and quantification of polyphenols from *Cassia auriculata* L leaf, flower and flower bud using UPLC-QqQ-MS/MS**

Devanesan Arul Ananth<sup>a,b</sup>, Vijayaraghavan Mahalakshmi<sup>c</sup>, Thilagar Sivasudha<sup>d</sup>, Liron Klipcan<sup>a</sup> and Zipora Tietel<sup>a</sup>

<sup>a</sup>Gilat Research Center, Agricultural Research Organization, M.P. Negev 8531100, Israel; <sup>b</sup>Current affiliation: Department of Biotechnology, Karpagam Academy of Higher Education, Coimbatore - 641 021, Tamil Nadu, India; <sup>c</sup>Department of Biotechnology, Anna University, Chennai – 600 025, Tamil Nadu, India; <sup>d</sup>Department of Environmental Biotechnology, Bharathidasan University, Tiruchirappalli – 620 024, Tamil Nadu, India

CONTACT Zipora Tietel [**e-mail**] [tietel@agri.gov.il](mailto:tietel@agri.gov.il)

### **Supplementary material**

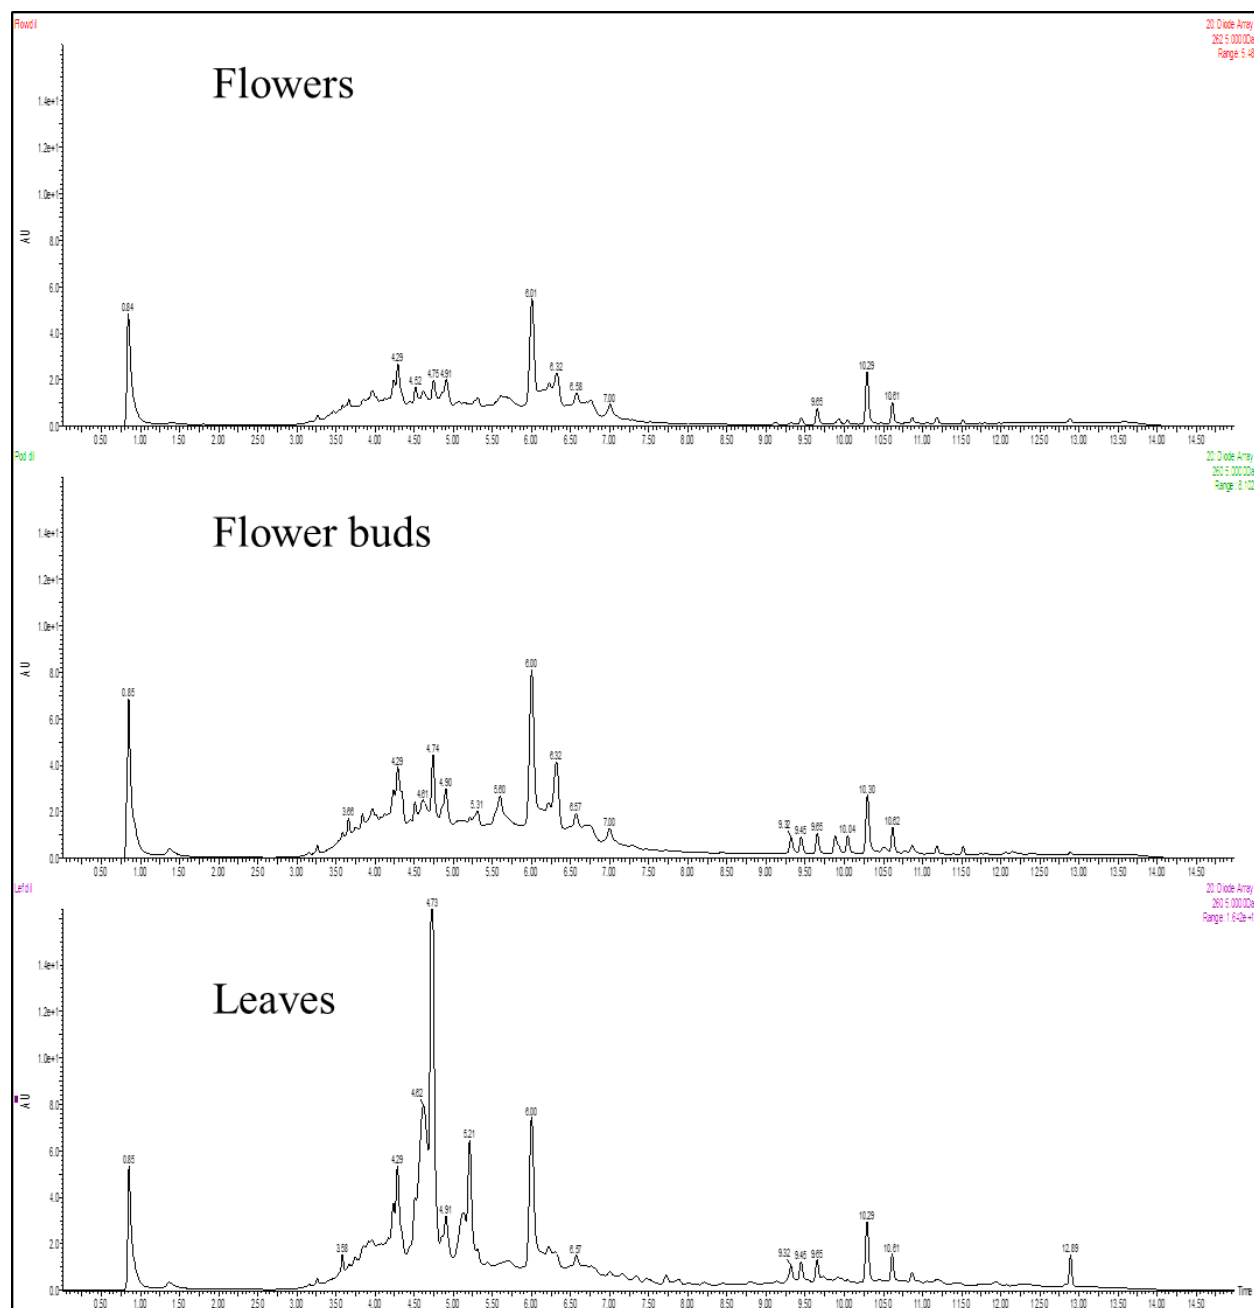

**Figure S1.** UPLC-QqQ- MS/MS total ion chromatogram (TIC) of *C. auriculata* extracts.

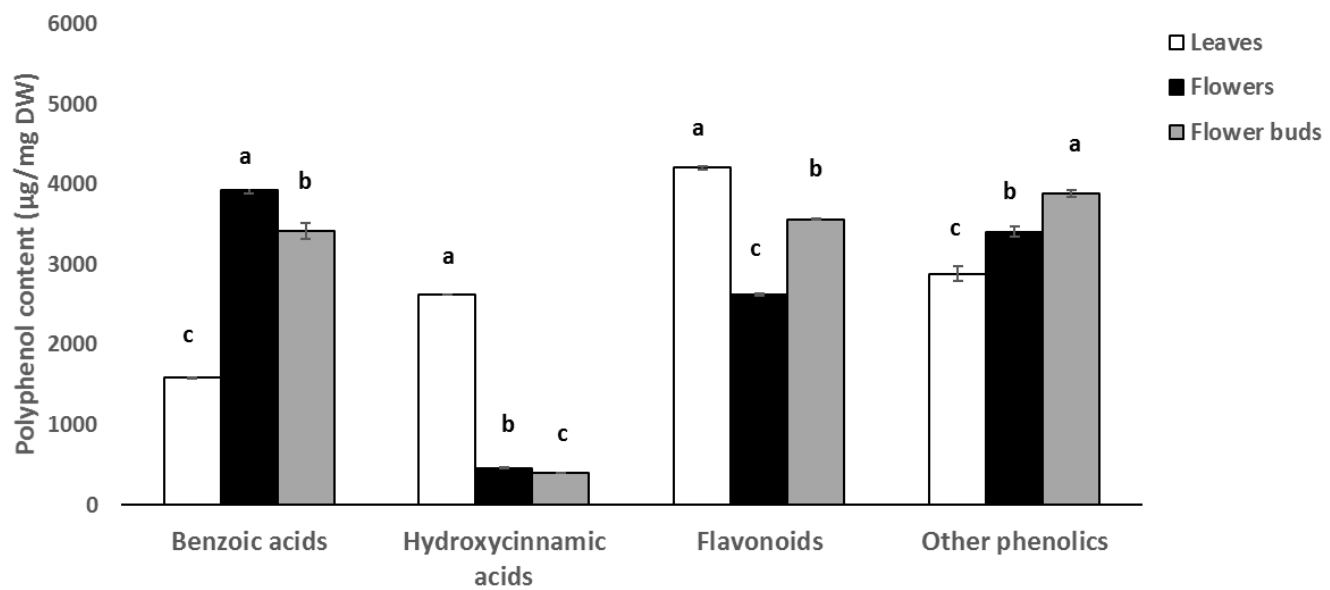

**Figure S2.** Comparative quantitative analysis of polyphenolic classes contents across *C. auriculata* plant parts. Values are Mean  $\pm$  SE (n = 3).

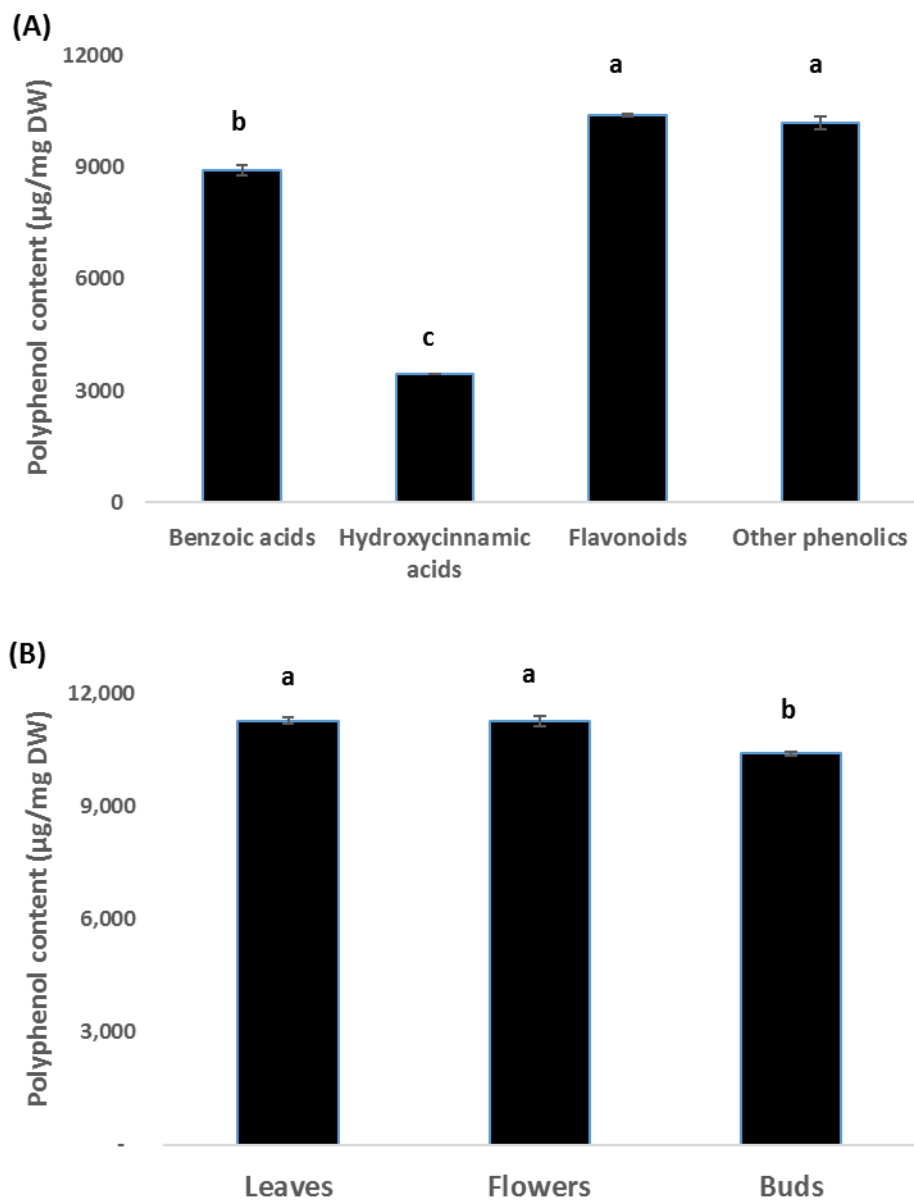

**Figure S3.** Polyphenol contents of *C. auriculata*. (A) Across polyphenolic classes (B) Across plant parts. Values are Mean  $\pm$  SE (n = 3).
